# Supplementary material
Source: Elsevier journal article supplement (https://www.sciencedirect.com/science/article/pii/S1699258X2030022X)
Supplement: mmc2 [file S1699258X2030022X:mmc2.pdf]

## Archivo suplementario 2. Diagrama de flujo de la estrategia de búsqueda en Scopus

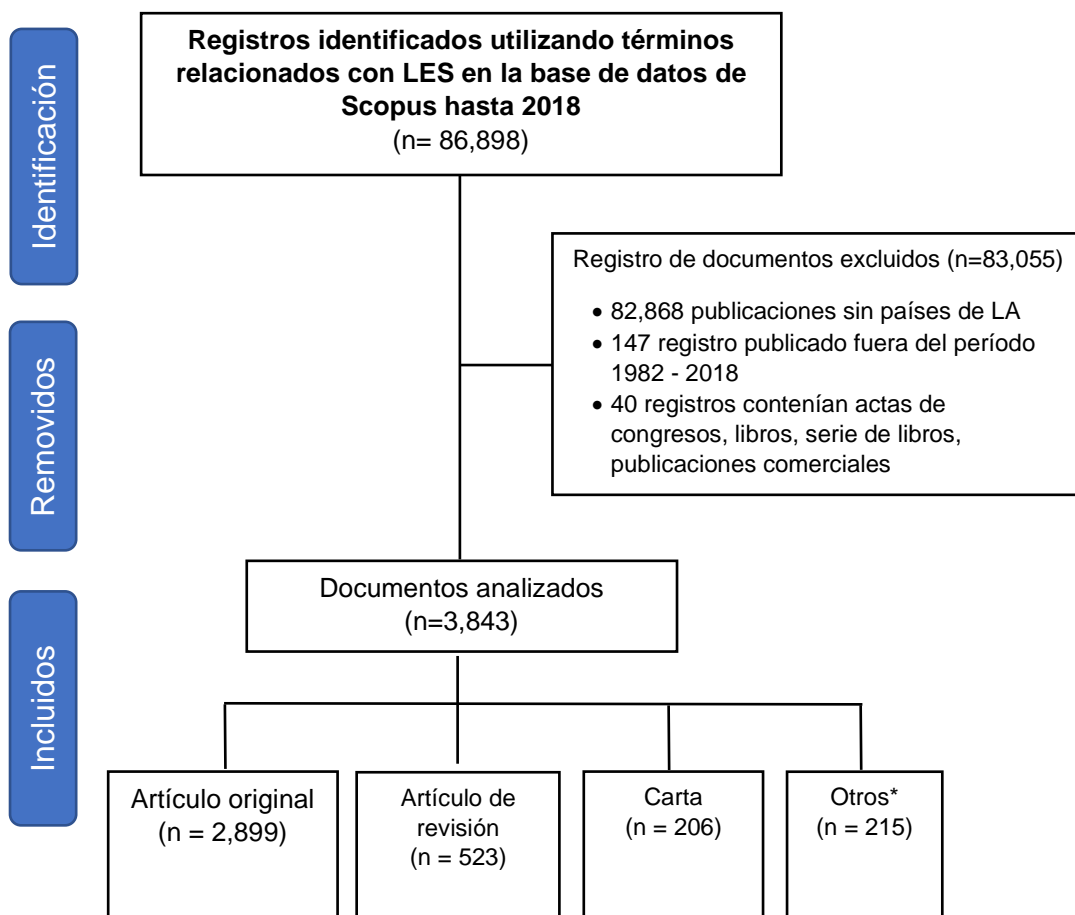

\*Otros: Documento de conferencia, Nota, Editorial, Encuesta breve, Errata
